# Supplementary material
Source: PubMed Central journal article supplement (PMC6589158)

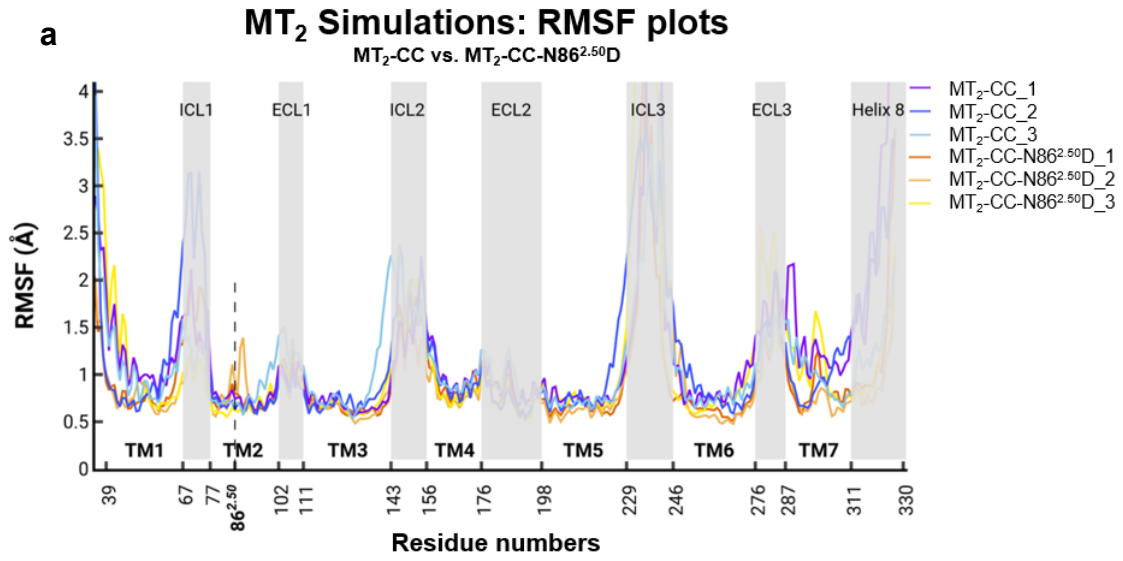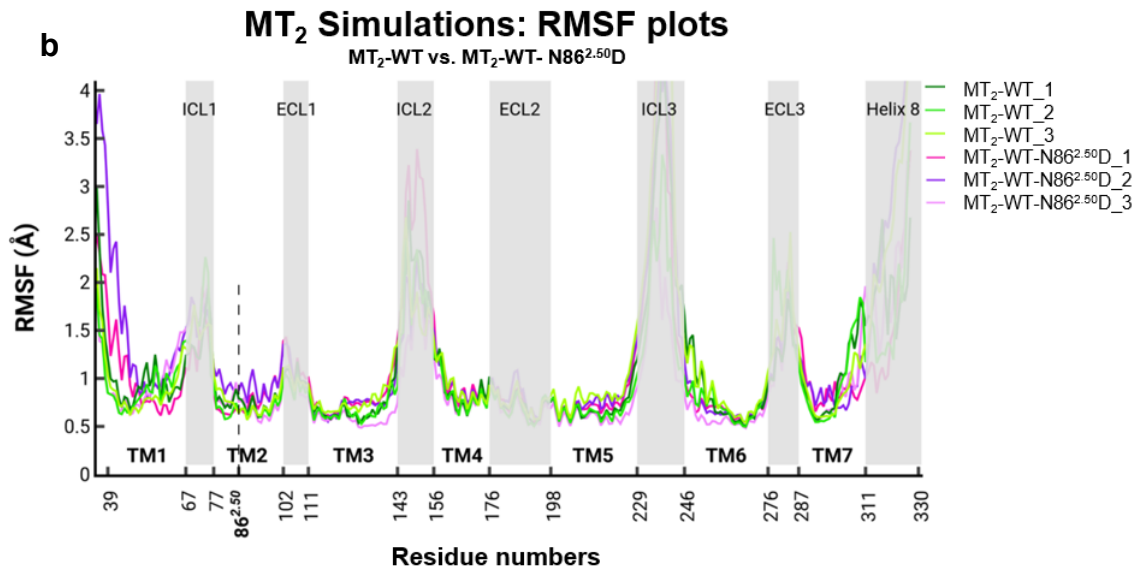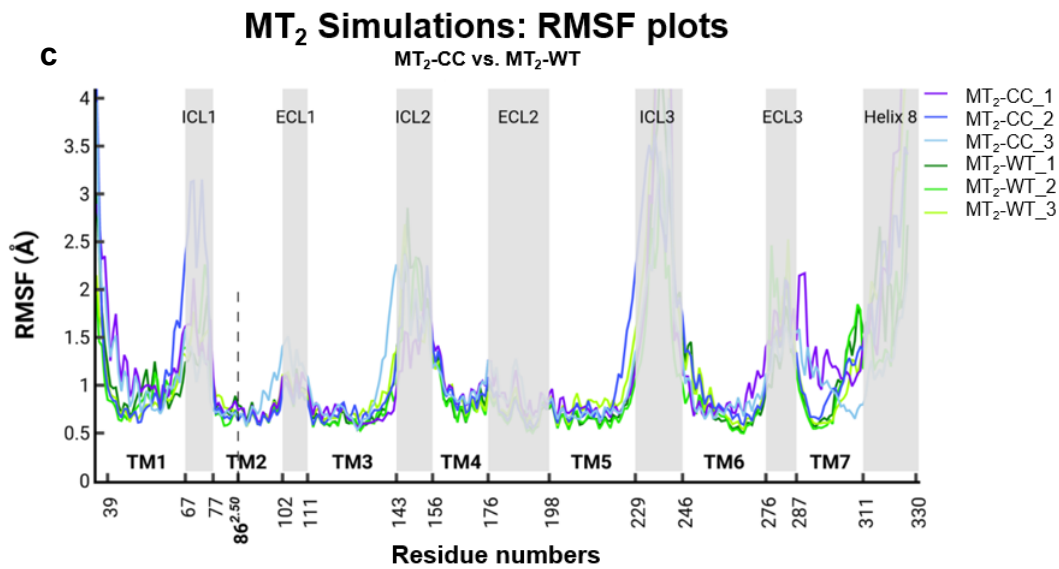

Supplement: NIHMS1525542-supplement-SI_Figure_1.pdf [file NIHMS1525542-supplement-SI_Figure_1.pdf]

● Melatonin   
 ■ 2-Phenylmelatonin   
 ▲ Agomelatine   
 ◆ Ramelteon

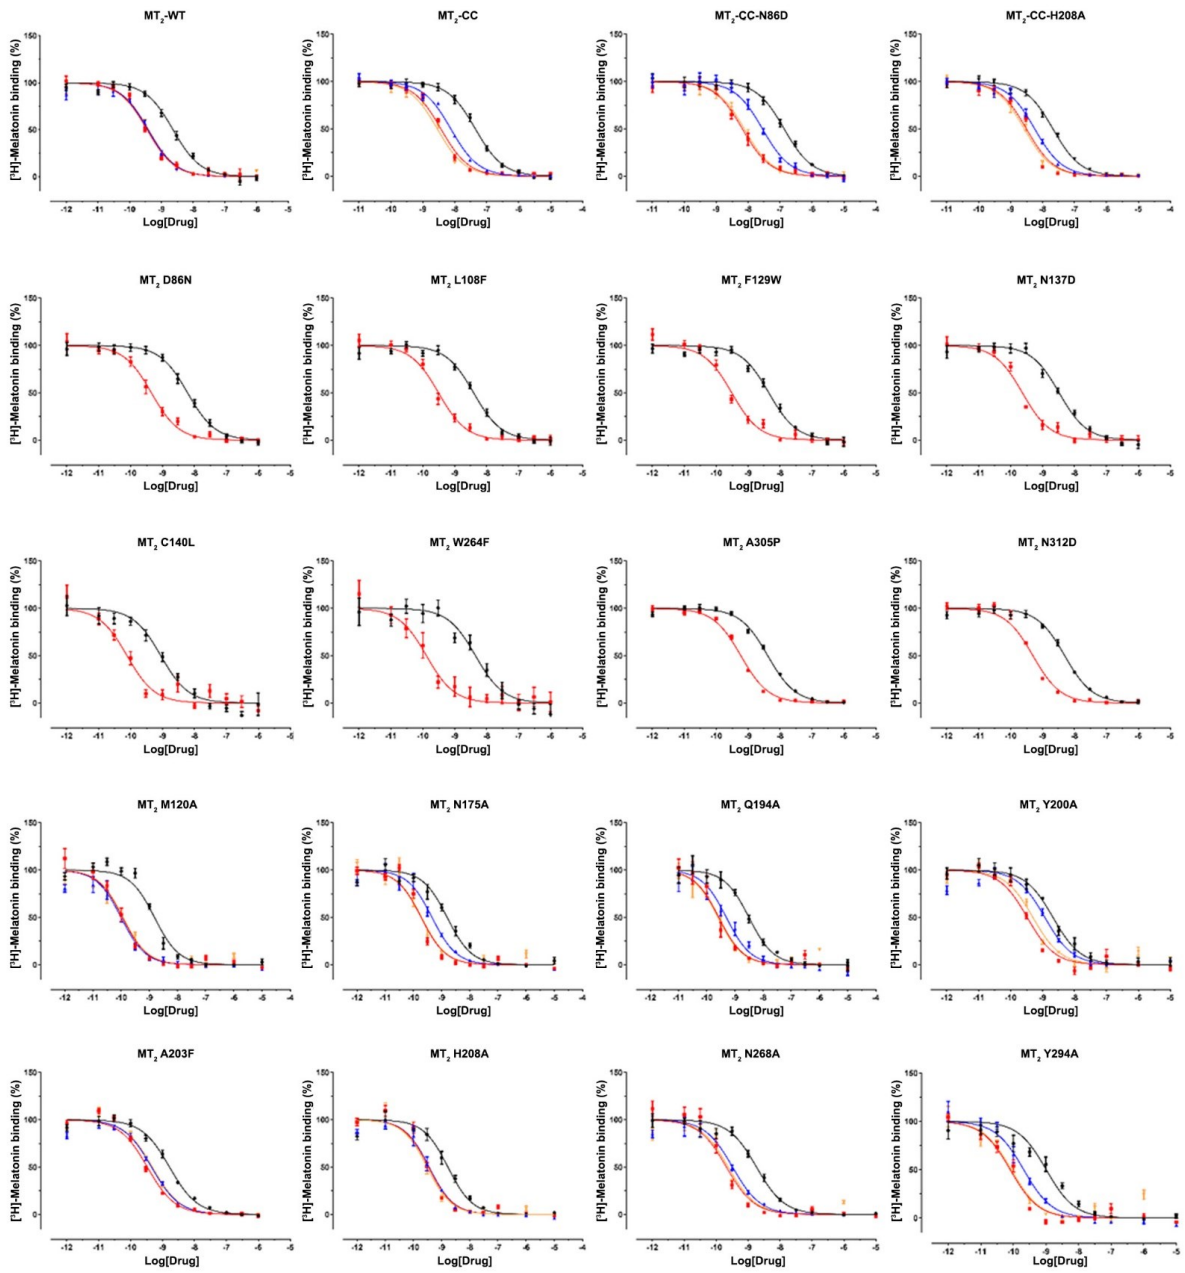

Supplement: NIHMS1525542-supplement-SI_Figure_2.pdf [file NIHMS1525542-supplement-SI_Figure_2.pdf]

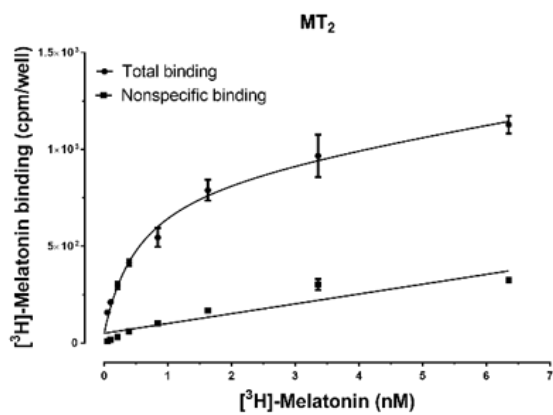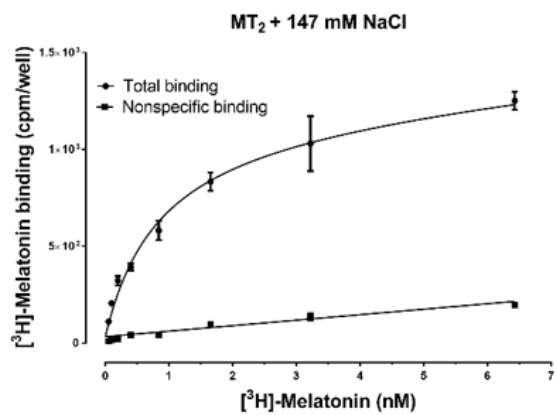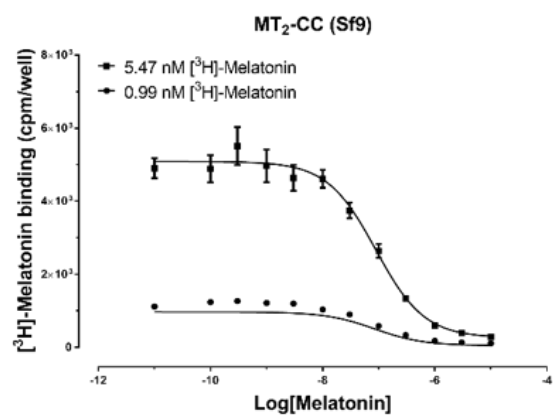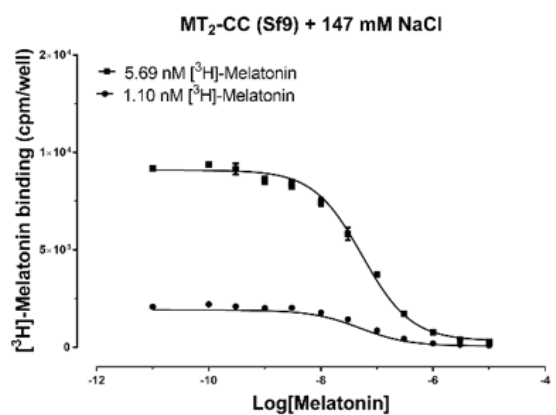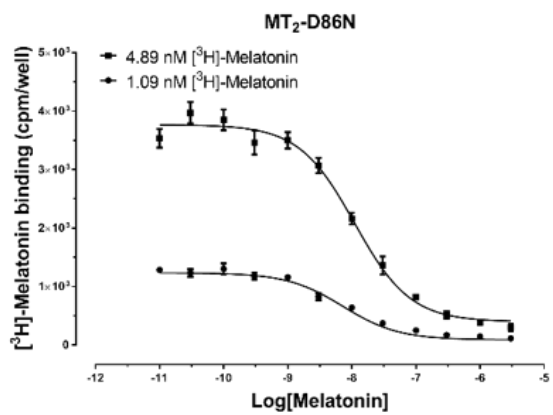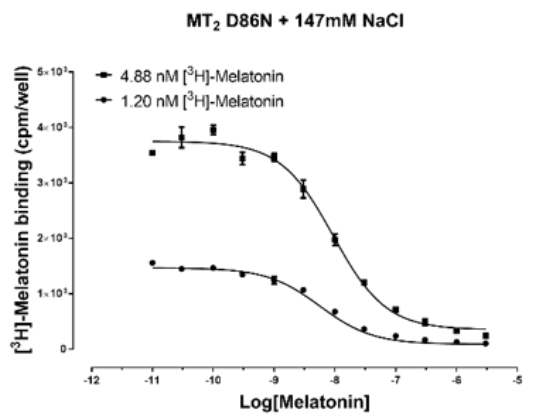

Supplement: NIHMS1525542-supplement-SI_Figure_3.pdf [file NIHMS1525542-supplement-SI_Figure_3.pdf]

● Melatonin ■ 2-Phenylmelatonin

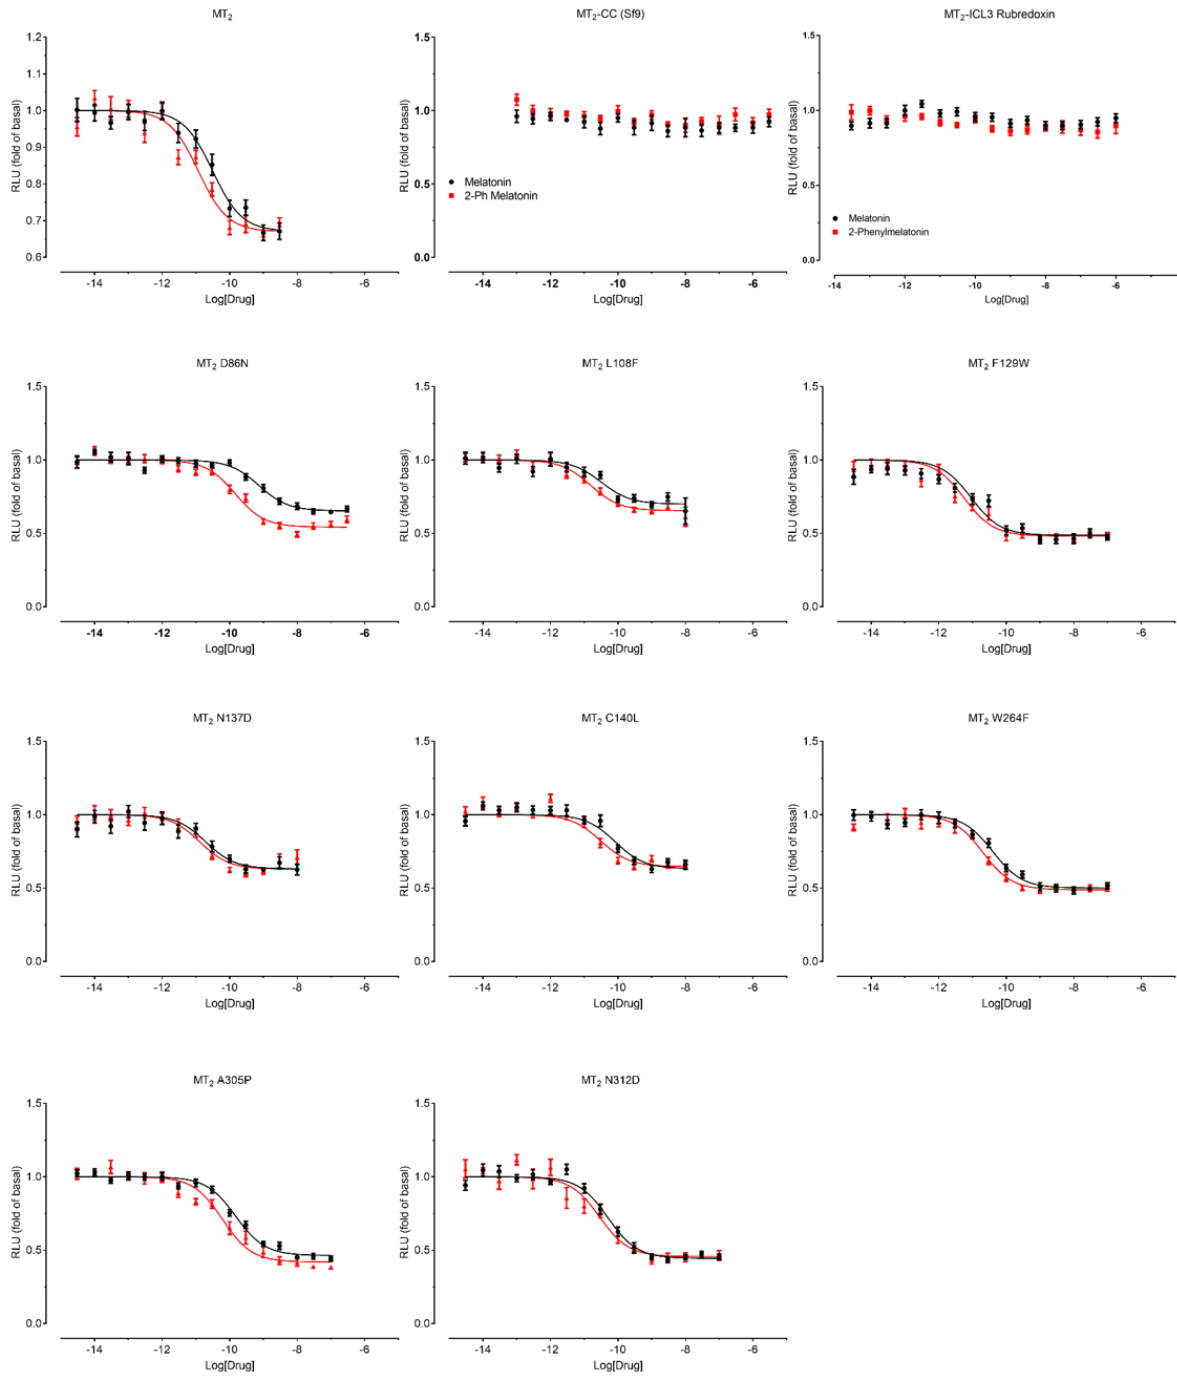

Supplement: NIHMS1525542-supplement-SI_Figure_4.pdf [file NIHMS1525542-supplement-SI_Figure_4.pdf]

● Melatonin ■ 2-Phenylmelatonin ▲ Agomelatine ▼ Ramelteon

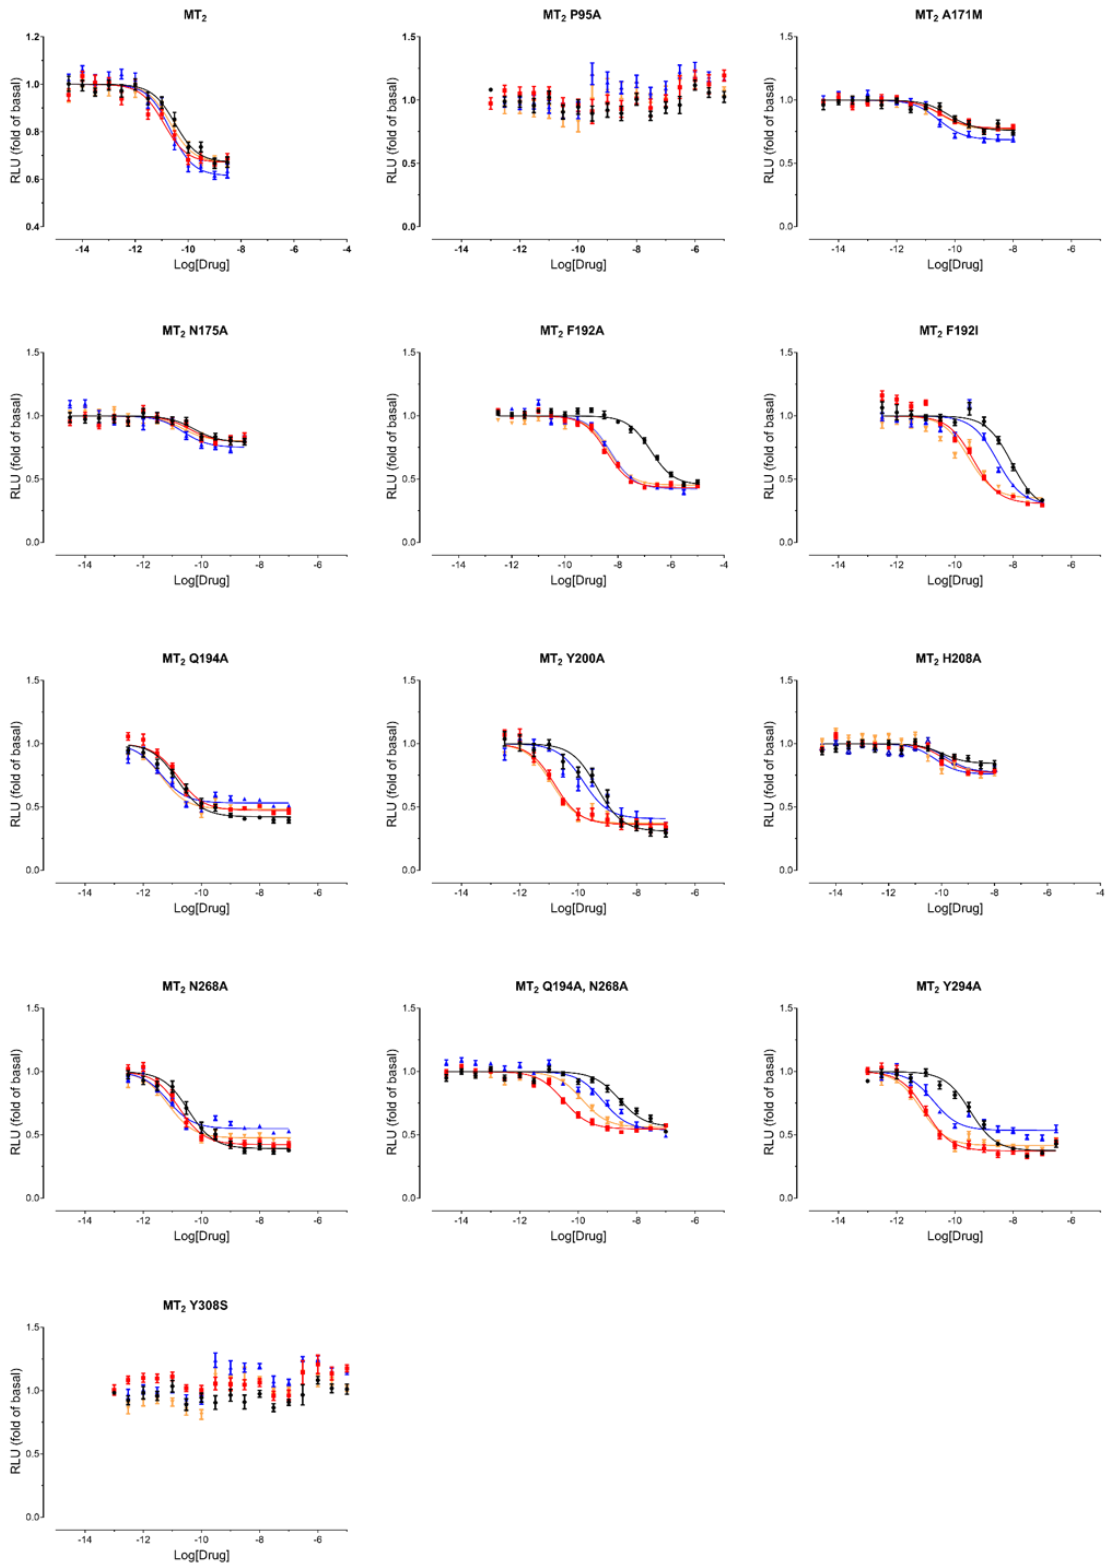

Supplement: NIHMS1525542-supplement-SI_Figure_5.pdf [file NIHMS1525542-supplement-SI_Figure_5.pdf]

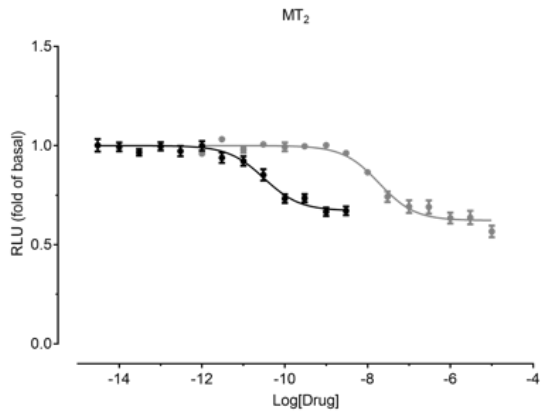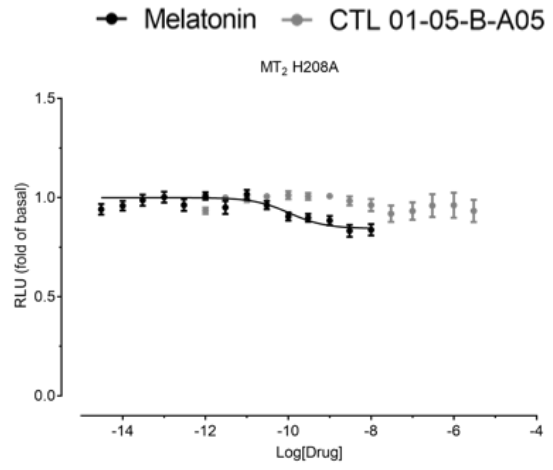

Supplement: NIHMS1525542-supplement-SI_Figure_6.pdf [file NIHMS1525542-supplement-SI_Figure_6.pdf]

— apo — + mlt — + 2-pmt

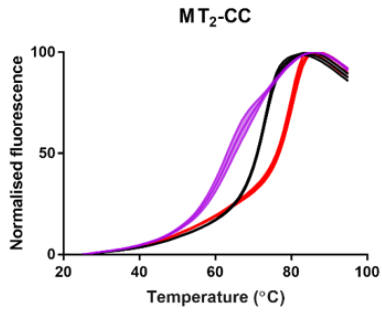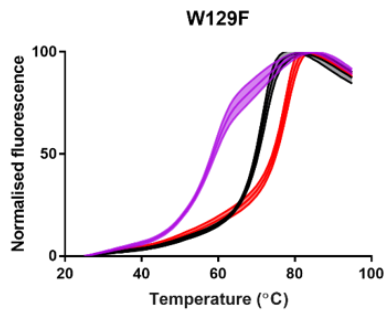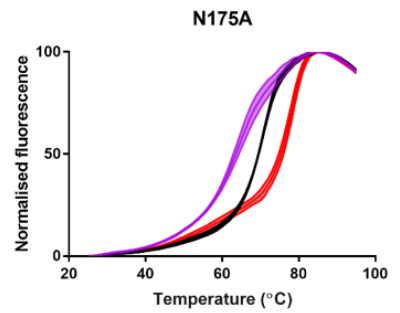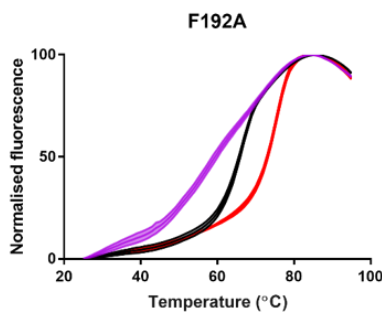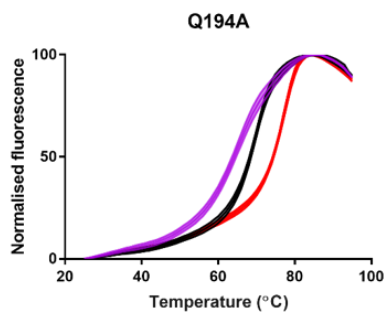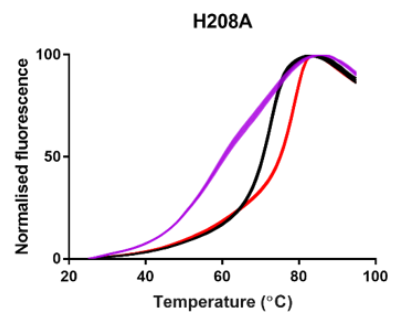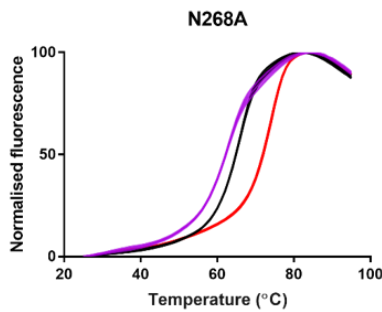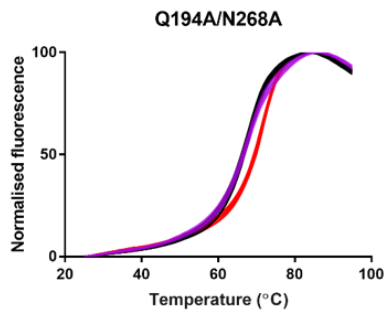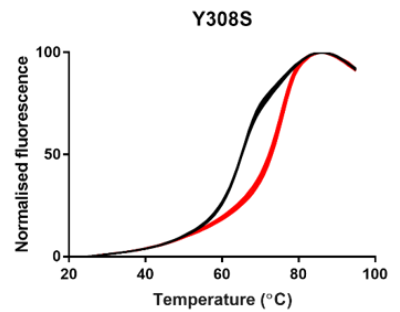

Supplement: NIHMS1525542-supplement-SI_Figure_7.pdf [file NIHMS1525542-supplement-SI_Figure_7.pdf]
